# Supplementary material for: Targeted Metabolomic Approach to Assess the Reproducibility of Plasma Metabolites over a Four Month Period in a Free-Living Population
Source: PubMed Central journal article supplement (PMC8902803; doi:10.1021/acs.jproteome.1c00440), 2022-01-03
Supplement: pr1c00440_si_001.pdf [file pr1c00440_si_001.pdf]

## SUPPORTING INFORMATION

### A targeted metabolomic approach to assess the reproducibility of plasma metabolites over a four-month period in a free-living population

Xiaofei Yin<sup>1,2</sup>, Orla Prendiville<sup>1,2</sup>, Aoife E. McNamara<sup>1,2</sup>, Lorraine Brennan<sup>\*,1,2</sup>

<sup>1</sup> UCD School of Agriculture and Food Science, Institute of Food and Health, University College Dublin, Belfield, Dublin 4, D4 V1W8, Ireland

<sup>2</sup> UCD Conway Institute of Biomolecular and Biomedical Research, University College Dublin, Belfield, Dublin 4, D4 V1W8, Ireland

\*Corresponding Author:

Professor Lorraine Brennan

School of Agriculture and Food Science,

Institute of Food and Health,

University College Dublin, Belfield, Dublin 4, Ireland.

Email: lorraine.brennan@ucd.ie

Phone: 00 353 1 7166815

#### TABLE OF CONTENTS

- S2** **Figure S1.** Distribution of % CV of metabolites quantified in pooled plasma QC sample. lysoPC: lysophosphatidylcholine; PC: phosphatidylcholine; aa: acyl-acyl; ae: acyl-alkyl.
- S3** **Table S1** Concentrations ( $\mu\text{M}$ ) of metabolites in each visit.
- S7** **Table S2** Impact of sex and age groups on the metabolite levels.

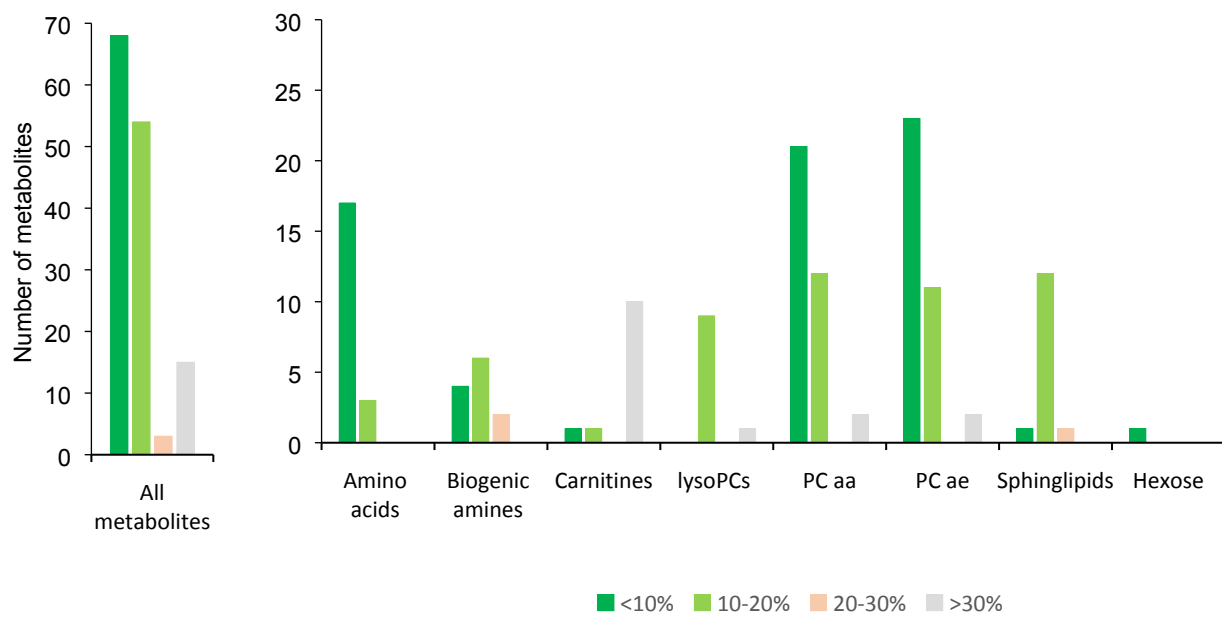

**Figure S1.** Distribution of % CV of metabolites quantified in pooled plasma QC sample. lysoPC: lysophosphatidylcholine; PC: phosphatidylcholine; aa: acyl-acyl; ae: acyl-alkyl.

**Table S1** Concentrations ( $\mu\text{M}$ ) of metabolites in each visit.

| Metabolites                    | V1 (n=186)         | V2 (n=166)         | V3 (n=156)         | V4 (n=151)         |
|--------------------------------|--------------------|--------------------|--------------------|--------------------|
| <b>Amino acids</b>             |                    |                    |                    |                    |
| Alanine                        | 360.87 $\pm$ 85.55 | 353.44 $\pm$ 78.14 | 368.08 $\pm$ 85.62 | 362.56 $\pm$ 92.35 |
| Arginine                       | 101.43 $\pm$ 20.18 | 99.4 $\pm$ 19.41   | 103.27 $\pm$ 20.03 | 100.39 $\pm$ 19.64 |
| Asparagine                     | 48.43 $\pm$ 8.66   | 49.96 $\pm$ 28.89  | 48.13 $\pm$ 10.32  | 47.46 $\pm$ 8.02   |
| Citrulline                     | 31.93 $\pm$ 7.34   | 31.95 $\pm$ 7.21   | 32.33 $\pm$ 7.01   | 32.3 $\pm$ 7.28    |
| Glutamine                      | 716.37 $\pm$ 90.98 | 722.25 $\pm$ 91.01 | 720.34 $\pm$ 83.2  | 705.59 $\pm$ 92.48 |
| Glutamate                      | 30.86 $\pm$ 18.72  | 31.9 $\pm$ 18.27   | 35.17 $\pm$ 19.00  | 35.33 $\pm$ 18.65  |
| Glycine                        | 276.24 $\pm$ 82.98 | 281.14 $\pm$ 81.40 | 284.65 $\pm$ 80.86 | 276.76 $\pm$ 75.65 |
| Histidine                      | 105.13 $\pm$ 12.17 | 105.11 $\pm$ 12.96 | 105.53 $\pm$ 12.24 | 103.32 $\pm$ 12.02 |
| Isoleucine                     | 81.80 $\pm$ 19.06  | 83.19 $\pm$ 18.50  | 82.65 $\pm$ 17.80  | 82.17 $\pm$ 20.41  |
| Leucine                        | 174.28 $\pm$ 37.64 | 176.63 $\pm$ 36.63 | 174.93 $\pm$ 34.75 | 172.97 $\pm$ 39.05 |
| Lysine                         | 292.28 $\pm$ 31.32 | 294.49 $\pm$ 33.07 | 295.21 $\pm$ 33.19 | 290.16 $\pm$ 31.66 |
| Methionine                     | 28.74 $\pm$ 5.58   | 28.84 $\pm$ 5.30   | 29.09 $\pm$ 5.32   | 28.64 $\pm$ 5.36   |
| Ornithine                      | 75.69 $\pm$ 15.42  | 75.36 $\pm$ 16.21  | 77.01 $\pm$ 15.68  | 75.41 $\pm$ 16.30  |
| Phenylalanine                  | 102.46 $\pm$ 11.89 | 102.93 $\pm$ 11.86 | 103.11 $\pm$ 10.98 | 101.61 $\pm$ 12.06 |
| Proline                        | 180.99 $\pm$ 56.94 | 185.92 $\pm$ 56.77 | 184.03 $\pm$ 53.30 | 184.28 $\pm$ 67.34 |
| Serine                         | 126.04 $\pm$ 27.63 | 127.68 $\pm$ 26.07 | 128.52 $\pm$ 24.26 | 125.96 $\pm$ 25.56 |
| Threonine                      | 130.57 $\pm$ 32.60 | 126.42 $\pm$ 31.48 | 128.16 $\pm$ 29.49 | 129.62 $\pm$ 32.25 |
| Tryptophan                     | 85.83 $\pm$ 12.83  | 85.76 $\pm$ 13.10  | 86.04 $\pm$ 12.56  | 84.76 $\pm$ 12.75  |
| Tyrosine                       | 73.47 $\pm$ 15.30  | 73.59 $\pm$ 14.95  | 74.88 $\pm$ 15.30  | 73.34 $\pm$ 15.10  |
| Valine                         | 277.80 $\pm$ 44.04 | 281.95 $\pm$ 43.51 | 281.98 $\pm$ 38.95 | 280.30 $\pm$ 41.10 |
| <b>Biogenic amines</b>         |                    |                    |                    |                    |
| Acetyloronithine               | 1.15 $\pm$ 1.11    | 1.3 $\pm$ 1.27     | 1.22 $\pm$ 0.92    | 1.24 $\pm$ 1.37    |
| Asymmetric dimethylarginine    | 0.48 $\pm$ 0.08    | 0.48 $\pm$ 0.08    | 0.49 $\pm$ 0.08    | 0.48 $\pm$ 0.08    |
| alpha-Aminoadipic acid         | 0.63 $\pm$ 0.28    | 0.64 $\pm$ 0.26    | 0.63 $\pm$ 0.27    | 0.63 $\pm$ 0.24    |
| Creatinine                     | 75.11 $\pm$ 16.48  | 76.14 $\pm$ 17.03  | 75.61 $\pm$ 16.94  | 75.69 $\pm$ 16.87  |
| Kynurenine                     | 2.38 $\pm$ 0.52    | 2.39 $\pm$ 0.53    | 2.39 $\pm$ 0.52    | 2.39 $\pm$ 0.54    |
| Putrescine                     | 0.13 $\pm$ 0.03    | 0.13 $\pm$ 0.04    | 0.12 $\pm$ 0.03    | 0.13 $\pm$ 0.03    |
| Sarcosine                      | 1.31 $\pm$ 0.51    | 1.33 $\pm$ 0.47    | 1.36 $\pm$ 0.46    | 1.38 $\pm$ 0.52    |
| Symmetric dimethylarginine     | 0.47 $\pm$ 0.08    | 0.47 $\pm$ 0.08    | 0.47 $\pm$ 0.08    | 0.46 $\pm$ 0.08    |
| Serotonin                      | 0.17 $\pm$ 0.13    | 0.14 $\pm$ 0.09    | 0.14 $\pm$ 0.11    | 0.13 $\pm$ 0.08    |
| <i>trans</i> -4-Hydroxyproline | 9.26 $\pm$ 4.95    | 9.57 $\pm$ 6.19    | 9.7 $\pm$ 4.74     | 9.34 $\pm$ 4.75    |
| Taurine                        | 53.33 $\pm$ 12.43  | 52.99 $\pm$ 11.34  | 54.06 $\pm$ 13.65  | 52.85 $\pm$ 12.39  |
| <b>Acylcarnitines</b>          |                    |                    |                    |                    |
| C0                             | 30.18 $\pm$ 7.42   | 30.82 $\pm$ 7.45   | 31.04 $\pm$ 7.55   | 30.69 $\pm$ 7.17   |
| C2                             | 6.64 $\pm$ 2.28    | 6.78 $\pm$ 2.57    | 6.13 $\pm$ 2.05    | 6.14 $\pm$ 2.00    |
| C3                             | 0.29 $\pm$ 0.09    | 0.3 $\pm$ 0.09     | 0.3 $\pm$ 0.10     | 0.3 $\pm$ 0.10     |
| C4                             | 0.23 $\pm$ 0.29    | 0.22 $\pm$ 0.13    | 0.23 $\pm$ 0.20    | 0.22 $\pm$ 0.15    |
| C6 (C4:1-DC)                   | 0.10 $\pm$ 0.08    | 0.10 $\pm$ 0.10    | 0.10 $\pm$ 0.10    | 0.10 $\pm$ 0.10    |
| C8                             | 0.30 $\pm$ 0.28    | 0.31 $\pm$ 0.30    | 0.32 $\pm$ 0.30    | 0.32 $\pm$ 0.30    |
| C10                            | 0.41 $\pm$ 0.34    | 0.42 $\pm$ 0.35    | 0.42 $\pm$ 0.34    | 0.41 $\pm$ 0.34    |

|                                 |              |              |              |              |
|---------------------------------|--------------|--------------|--------------|--------------|
| C10:1                           | 0.28±0.18    | 0.29±0.20    | 0.29±0.19    | 0.29±0.20    |
| C14:1                           | 0.17±0.17    | 0.19±0.20    | 0.19±0.20    | 0.19±0.21    |
| C18:1                           | 0.13±0.08    | 0.14±0.09    | 0.14±0.10    | 0.14±0.10    |
| <b>lysoPhosphatidylcholines</b> |              |              |              |              |
| lysoPC a C16:0                  | 59.38±14.81  | 60.84±14.65  | 60.96±14.41  | 59.64±15     |
| lysoPC a C16:1                  | 17.58±124.97 | 1.85±0.62    | 1.83±0.63    | 1.79±0.62    |
| lysoPC a C17:0                  | 1.23±0.43    | 1.26±0.44    | 1.29±0.46    | 1.23±0.44    |
| lysoPC a C18:0                  | 18.00±5.61   | 18.17±5.46   | 18.67±5.62   | 18.09±5.82   |
| lysoPC a C18:1                  | 15.18±5.31   | 15.98±5.37   | 15.95±5.39   | 15.66±5.18   |
| lysoPC a C18:2                  | 25.76±11.11  | 26.95±10.52  | 27.42±10.18  | 27.27±10.17  |
| lysoPC a C20:3                  | 1.56±0.59    | 1.64±0.62    | 1.65±0.67    | 1.64±0.64    |
| lysoPC a C20:4                  | 4.49±1.68    | 4.69±1.74    | 4.64±1.74    | 4.56±1.74    |
| lysoPC a C28:0                  | 0.14±0.03    | 0.14±0.03    | 0.14±0.03    | 0.14±0.03    |
| lysoPC a C28:1                  | 0.33±0.15    | 0.33±0.15    | 0.33±0.15    | 0.33±0.15    |
| <b>Phosphatidylcholines</b>     |              |              |              |              |
| PC aa C24:0                     | 0.07±0.03    | 0.07±0.05    | 0.07±0.03    | 0.07±0.03    |
| PC aa C28:1                     | 2.59±0.77    | 2.56±0.75    | 2.53±0.71    | 2.48±0.66    |
| PC aa C30:0                     | 3.42±1.38    | 3.39±1.37    | 3.29±1.19    | 3.22±1.1     |
| PC aa C32:0                     | 11.14±2.46   | 11±2.22      | 10.76±2.35   | 10.47±2.09   |
| PC aa C32:1                     | 11.01±5.76   | 11.28±6.05   | 10.69±5.51   | 10.55±5.51   |
| PC aa C32:2                     | 3.57±1.80    | 3.52±1.68    | 3.55±1.74    | 3.44±1.45    |
| PC aa C32:3                     | 0.36±0.10    | 0.35±0.10    | 0.37±0.11    | 0.35±0.09    |
| PC aa C34:1                     | 172.45±42.23 | 176.58±43.99 | 173.15±39.91 | 170.31±41.23 |
| PC aa C34:2                     | 300.58±57.8  | 302.17±55.45 | 302.78±52.06 | 298.91±52.11 |
| PC aa C34:3                     | 13.58±4.49   | 13.87±4.88   | 14.10±4.72   | 13.76±4.48   |
| PC aa C34:4                     | 1.25±0.58    | 1.24±0.55    | 1.24±0.54    | 1.21±0.46    |
| PC aa C36:0                     | 2.45±1.15    | 2.35±1.04    | 2.39±1.02    | 2.24±0.99    |
| PC aa C36:1                     | 42.07±11.75  | 43.06±11.95  | 43.44±11.2   | 42.37±11.27  |
| PC aa C36:2                     | 204.8±47.86  | 206.17±44.59 | 210.31±41.25 | 205.98±41.9  |
| PC aa C36:3                     | 111.07±26.5  | 112.74±30.49 | 112.87±26.97 | 111.11±25.14 |
| PC aa C36:4                     | 147.11±38.09 | 146.6±37     | 142.81±32.11 | 141.17±32.59 |
| PC aa C36:5                     | 21.79±12.73  | 21.85±11.41  | 21.77±10.85  | 19.76±8.89   |
| PC aa C36:6                     | 0.90±0.45    | 0.90±0.43    | 0.91±0.43    | 0.84±0.35    |
| PC aa C38:0                     | 2.65±0.84    | 2.66±0.86    | 2.68±0.85    | 2.54±0.81    |
| PC aa C38:1                     | 0.88±0.54    | 0.89±0.61    | 0.96±0.60    | 0.86±0.58    |
| PC aa C38:3                     | 36.12±10.86  | 36.16±10.81  | 36.43±10.57  | 35.4±10.24   |
| PC aa C38:4                     | 81.47±21.91  | 80.55±22.45  | 80.11±19.31  | 77.93±19.47  |
| PC aa C38:5                     | 43.31±12.32  | 43.38±11.44  | 42.89±10.68  | 41.14±10.65  |
| PC aa C38:6                     | 65.31±23.25  | 65.18±22.69  | 63.98±21.2   | 60.05±18.68  |
| PC aa C40:2                     | 0.22±0.06    | 0.22±0.06    | 0.23±0.07    | 0.22±0.06    |
| PC aa C40:3                     | 0.42±0.10    | 0.42±0.10    | 0.43±0.10    | 0.41±0.09    |
| PC aa C40:4                     | 2.26±0.59    | 2.25±0.59    | 2.22±0.57    | 2.19±0.59    |
| PC aa C40:5                     | 7.3±2.34     | 7.2±2.16     | 7.23±2.20    | 7.05±2.25    |
| PC aa C40:6                     | 21.04±7.91   | 20.83±7.66   | 20.8±7.19    | 19.75±6.86   |

|             |            |            |            |            |
|-------------|------------|------------|------------|------------|
| PC aa C42:0 | 0.48±0.11  | 0.48±0.12  | 0.48±0.11  | 0.45±0.10  |
| PC aa C42:1 | 0.17±0.04  | 0.17±0.04  | 0.17±0.04  | 0.17±0.04  |
| PC aa C42:2 | 0.18±0.04  | 0.18±0.05  | 0.18±0.04  | 0.18±0.05  |
| PC aa C42:4 | 0.12±0.03  | 0.12±0.03  | 0.12±0.02  | 0.12±0.03  |
| PC aa C42:5 | 0.26±0.08  | 0.25±0.07  | 0.26±0.07  | 0.24±0.06  |
| PC aa C42:6 | 0.41±0.13  | 0.40±0.12  | 0.4±0.10   | 0.38±0.10  |
| PC ae C30:0 | 0.31±0.09  | 0.31±0.10  | 0.31±0.09  | 0.30±0.09  |
| PC ae C30:1 | 0.09±0.06  | 0.09±0.06  | 0.1±0.08   | 0.09±0.06  |
| PC ae C30:2 | 0.09±0.02  | 0.09±0.02  | 0.09±0.02  | 0.08±0.02  |
| PC ae C32:1 | 2.41±0.54  | 2.38±0.53  | 2.42±0.53  | 2.31±0.52  |
| PC ae C32:2 | 0.62±0.15  | 0.62±0.16  | 0.63±0.16  | 0.60±0.15  |
| PC ae C34:0 | 1.16±0.39  | 1.17±0.37  | 1.17±0.38  | 1.12±0.35  |
| PC ae C34:1 | 8.09±1.77  | 8.13±1.89  | 8.12±1.74  | 7.81±1.70  |
| PC ae C34:2 | 10.36±2.52 | 10.27±2.66 | 10.56±2.58 | 10.18±2.48 |
| PC ae C34:3 | 7.72±2.30  | 7.45±2.12  | 7.64±2.20  | 7.38±2.14  |
| PC ae C36:0 | 0.68±0.16  | 0.68±0.16  | 0.68±0.16  | 0.66±0.15  |
| PC ae C36:1 | 5.8±1.54   | 5.87±1.57  | 5.87±1.51  | 5.62±1.45  |
| PC ae C36:2 | 12.57±3.22 | 12.55±3.23 | 12.86±3.21 | 12.3±2.92  |
| PC ae C36:3 | 6.84±1.56  | 6.82±1.65  | 7.01±1.62  | 6.78±1.56  |
| PC ae C36:4 | 15.47±4.61 | 15.24±4.12 | 15.44±4.12 | 14.98±4.28 |
| PC ae C36:5 | 10.08±4.02 | 9.74±2.87  | 9.93±3.06  | 9.53±3.15  |
| PC ae C38:0 | 2.36±0.84  | 2.37±0.87  | 2.42±0.84  | 2.25±0.73  |
| PC ae C38:1 | 0.33±0.15  | 0.33±0.15  | 0.370.14   | 0.33±0.15  |
| PC ae C38:2 | 1.29±0.31  | 1.30±0.33  | 1.34±0.33  | 1.28±0.31  |
| PC ae C38:3 | 2.64±0.69  | 2.66±0.69  | 2.69±0.70  | 2.57±0.63  |
| PC ae C38:4 | 10.96±2.65 | 10.87±2.47 | 10.92±2.47 | 10.45±2.27 |
| PC ae C38:5 | 14.04±3.48 | 13.88±2.93 | 14.03±2.96 | 13.49±3.03 |
| PC ae C38:6 | 6.42±2.09  | 6.36±1.94  | 6.45±1.93  | 6.10±1.94  |
| PC ae C40:1 | 1.12±0.29  | 1.11±0.28  | 1.14±0.28  | 1.09±0.26  |
| PC ae C40:2 | 1.37±0.41  | 1.37±0.40  | 1.37±0.38  | 1.30±0.36  |
| PC ae C40:3 | 0.64±0.12  | 0.65±0.13  | 0.65±0.13  | 0.63±0.11  |
| PC ae C40:4 | 1.53±0.29  | 1.51±0.30  | 1.53±0.29  | 1.47±0.27  |
| PC ae C40:5 | 2.36±0.50  | 2.35±0.45  | 2.35±0.46  | 2.25±0.43  |
| PC ae C40:6 | 3.95±1.19  | 3.96±1.17  | 3.97±1.15  | 3.73±1.05  |
| PC ae C42:1 | 0.28±0.05  | 0.28±0.05  | 0.28±0.05  | 0.28±0.05  |
| PC ae C42:2 | 0.48±0.11  | 0.48±0.11  | 0.49±0.12  | 0.47±0.11  |
| PC ae C42:3 | 0.65±0.13  | 0.65±0.15  | 0.65±0.15  | 0.63±0.13  |
| PC ae C42:4 | 0.66±0.14  | 0.66±0.15  | 0.66±0.14  | 0.64±0.14  |
| PC ae C42:5 | 1.55±0.31  | 1.54±0.32  | 1.54±0.29  | 1.49±0.28  |
| PC ae C44:3 | 0.07±0.01  | 0.07±0.01  | 0.07±0.01  | 0.07±0.01  |
| PC ae C44:4 | 0.31±0.07  | 0.31±0.07  | 0.31±0.06  | 0.30±0.07  |
| PC ae C44:5 | 1.47±0.38  | 1.47±0.38  | 1.47±0.33  | 1.42±0.33  |
| PC ae C44:6 | 1.05±0.26  | 1.05±0.25  | 1.05±0.24  | 1.00±0.23  |

---

**Sphingomyelins**

|               |                |                |                |                |
|---------------|----------------|----------------|----------------|----------------|
| SM (OH) C14:1 | 6.57±2.08      | 6.55±2.00      | 6.49±1.85      | 6.29±1.77      |
| SM (OH) C16:1 | 3.50±1.09      | 3.50±1.05      | 3.46±1.01      | 3.34±0.96      |
| SM (OH) C22:1 | 12.67±3.39     | 12.62±3.23     | 12.46±2.93     | 12.07±2.73     |
| SM (OH) C22:2 | 12.35±3.56     | 12.28±3.39     | 12.24±2.99     | 11.74±2.92     |
| SM (OH) C24:1 | 1.24±0.35      | 1.24±0.32      | 1.23±0.31      | 1.19±0.30      |
| SM C16:0      | 113.72±21.93   | 113.19±20.74   | 112.77±19.57   | 108.75±18.55   |
| SM C16:1      | 15.77±3.37     | 15.66±3.29     | 15.59±3.08     | 15.18±3.03     |
| SM C18:0      | 23.94±6.12     | 23.85±5.78     | 23.47±5.68     | 22.6±5.73      |
| SM C18:1      | 11.41±3.09     | 11.45±3.05     | 11.29±2.8      | 10.94±2.74     |
| SM C20:2      | 0.33±0.10      | 0.33±0.10      | 0.33±0.09      | 0.31±0.09      |
| SM C24:0      | 20.32±4.44     | 20.24±4.54     | 19.87±3.96     | 19.46±3.91     |
| SM C24:1      | 56.91±11.83    | 57.12±11.89    | 56.57±10.95    | 54.47±9.99     |
| SM C26:0      | 0.11±0.03      | 0.11±0.04      | 0.11±0.03      | 0.11±0.03      |
| SM C26:1      | 0.28±0.09      | 0.28±0.09      | 0.27±0.09      | 0.26±0.07      |
| Hexose (H1)   | 4860.75±501.68 | 4907.77±565.99 | 4915.99±532.07 | 4855.54±494.15 |

Abbreviations are as follows. Cx:y: x=number of carbons in the fatty acid side chain, y=number of double bonds in the fatty acid side chain; DC: decarboxyl; OH: hydroxyl; lysoPC: lysophosphatidylcholine; PC: phosphatidylcholine; aa: acyl-acyl; ae: acyl-alkyl; SM: sphingomyelin.

Note: Amino acids and biogenic amines were quantified based on internal standards and calibration curves consisting of seven calibration standards, while acylcarnitines, LPCs, PCs, SMs and hexose were evaluated semi-quantitatively by using 13 internal standards for lipids and acylcarnitines and 1 for the hexose.

**Table S2** Impact of sex and age groups on the metabolite levels.

| Metabolites                 | P value (Sex) * | FDR adjusted (Sex) ** | P value (Age) * | FDR adjusted (Age) ** |
|-----------------------------|-----------------|-----------------------|-----------------|-----------------------|
| <b>Amino acids</b>          |                 |                       |                 |                       |
| Alanine                     | 0.7009          | 0.7677                | 0.9078          | 0.9211                |
| Arginine                    | 0.2033          | 0.2862                | 0.2031          | 0.2644                |
| Asparagine                  | 0.7205          | 0.7768                | 0.0007          | <b>0.0017</b>         |
| Citrulline                  | 0.0322          | 0.0645                | 0.0387          | 0.0588                |
| Glutamine                   | 0.0129          | <b>0.0307</b>         | 0.0014          | <b>0.0031</b>         |
| Glutamate                   | 0.0004          | <b>0.0026</b>         | 0.0000          | <b>7.0769E-06</b>     |
| Glycine                     | 0.3734          | 0.4727                | 0.1145          | 0.1612                |
| Histidine                   | 0.5951          | 0.6844                | 0.8708          | 0.9070                |
| Isoleucine                  | 0.0000          | <b>1.4556E-09</b>     | 0.5119          | 0.6143                |
| Leucine                     | 0.0000          | <b>8.2241E-12</b>     | 0.8301          | 0.8853                |
| Lysine                      | 0.0859          | 0.1412                | 0.0015          | <b>0.0034</b>         |
| Methionine                  | 0.0128          | <b>0.0307</b>         | 0.3975          | 0.4898                |
| Ornithine                   | 0.0020          | <b>0.0093</b>         | 0.0034          | <b>0.0066</b>         |
| Phenylalanine               | 0.0000          | <b>0.0004</b>         | 0.5667          | 0.6410                |
| Proline                     | 0.0003          | <b>0.0021</b>         | 0.6331          | 0.7046                |
| Serine                      | 0.1156          | 0.1772                | 0.1912          | 0.2513                |
| Threonine                   | 0.0440          | 0.0829                | 0.0099          | <b>0.0173</b>         |
| Tryptophan                  | 0.0000          | <b>0.0001</b>         | 0.2871          | 0.3668                |
| Tyrosine                    | 0.0038          | <b>0.0138</b>         | 0.0554          | 0.0831                |
| Valine                      | 0.0000          | <b>0.0001</b>         | 0.5448          | 0.6345                |
| <b>Biogenic amines</b>      |                 |                       |                 |                       |
| Acetylorntithine            | 0.6156          | 0.6923                | 0.9015          | 0.9211                |
| Asymmetric dimethylarginine | 0.0636          | 0.1070                | 0.0000          | <b>1.0535E-06</b>     |
| alpha-Amino adipic acid     | 0.0000          | <b>3.9750E-07</b>     | 0.0299          | <b>0.0479</b>         |
| Creatinine                  | 0.0000          | <b>6.4671E-17</b>     | 0.0868          | 0.1235                |
| Kynurenine                  | 0.0000          | <b>7.5845E-09</b>     | 0.0100          | <b>0.0173</b>         |
| Putrescine                  | 0.0127          | <b>0.0307</b>         | 0.1787          | 0.2371                |
| Sarcosine                   | 0.0000          | <b>0.0001</b>         | 0.8742          | 0.9070                |
| Symmetric dimethylarginine  | 0.0000          | <b>0.0002</b>         | 0.2053          | 0.2648                |
| Serotonin                   | 0.2611          | 0.3498                | 0.8209          | 0.8850                |
| trans-4-Hydroxyproline      | 0.0481          | 0.0884                | 0.0706          | 0.1015                |
| Taurine                     | 0.9187          | 0.9391                | 0.0046          | <b>0.0086</b>         |
| <b>Acylcarnitines</b>       |                 |                       |                 |                       |
| C0                          | 0.0000          | <b>2.1551E-06</b>     | 0.0000          | <b>0.0001</b>         |
| C2                          | 0.0532          | 0.0941                | 0.0338          | 0.0518                |
| C3                          | 0.0000          | <b>9.9427E-06</b>     | 0.0005          | <b>0.0012</b>         |
| C4                          | 0.0008          | <b>0.0040</b>         | 0.6275          | 0.7040                |
| C6 (C4:1-DC)                | 0.2194          | 0.3028                | 0.8039          | 0.8735                |
| C8                          | 0.1425          | 0.2161                | 0.5378          | 0.6343                |
| C10                         | 0.1845          | 0.2652                | 0.5208          | 0.6195                |
| C10:1                       | 0.0284          | 0.0594                | 0.6792          | 0.7442                |
| C14:1                       | 0.0117          | <b>0.0299</b>         | 0.5563          | 0.6345                |

|                                 |        |                   |        |                   |
|---------------------------------|--------|-------------------|--------|-------------------|
| C18:1                           | 0.0089 | <b>0.0236</b>     | 0.1718 | 0.2302            |
| <b>lysoPhosphatidylcholines</b> |        |                   |        |                   |
| lysoPC a C16:0                  | 0.0071 | <b>0.0201</b>     | 0.0019 | <b>0.0040</b>     |
| lysoPC a C16:1                  | 0.0071 | <b>0.0201</b>     | 0.0001 | <b>0.0004</b>     |
| lysoPC a C17:0                  | 0.0046 | <b>0.0151</b>     | 0.0000 | <b>9.3259E-08</b> |
| lysoPC a C18:0                  | 0.0089 | <b>0.0236</b>     | 0.0001 | <b>0.0004</b>     |
| lysoPC a C18:1                  | 0.0100 | <b>0.0262</b>     | 0.1497 | 0.2066            |
| lysoPC a C18:2                  | 0.0023 | <b>0.0101</b>     | 0.5511 | 0.6345            |
| lysoPC a C20:3                  | 0.0000 | <b>1.7250E-05</b> | 0.0070 | <b>0.0128</b>     |
| lysoPC a C20:4                  | 0.0000 | <b>0.0004</b>     | 0.3857 | 0.4795            |
| lysoPC a C28:0                  | 0.3515 | 0.4534            | 0.0560 | 0.0831            |
| lysoPC a C28:1                  | 0.3611 | 0.4613            | 0.1569 | 0.2144            |
| <b>Phosphatidylcholines</b>     |        |                   |        |                   |
| PC aa C24:0                     | 0.8672 | 0.9066            | 0.0021 | <b>0.0044</b>     |
| PC aa C28:1                     | 0.1873 | 0.2664            | 0.0000 | <b>6.3963E-10</b> |
| PC aa C30:0                     | 0.0004 | <b>0.0027</b>     | 0.0006 | <b>0.0015</b>     |
| PC aa C32:0                     | 0.0020 | <b>0.0093</b>     | 0.0003 | <b>0.0008</b>     |
| PC aa C32:1                     | 0.0127 | <b>0.0307</b>     | 0.0013 | <b>0.0029</b>     |
| PC aa C32:2                     | 0.0028 | <b>0.0114</b>     | 0.0330 | 0.0512            |
| PC aa C32:3                     | 0.0058 | <b>0.0178</b>     | 0.0000 | <b>3.6662E-06</b> |
| PC aa C34:1                     | 0.6171 | 0.6923            | 0.9046 | 0.9211            |
| PC aa C34:2                     | 0.7183 | 0.7768            | 0.4551 | 0.5525            |
| PC aa C34:3                     | 0.1534 | 0.2253            | 0.3159 | 0.3964            |
| PC aa C34:4                     | 0.0071 | <b>0.0201</b>     | 0.0017 | <b>0.0036</b>     |
| PC aa C36:0                     | 0.0876 | 0.1423            | 0.0012 | <b>0.0027</b>     |
| PC aa C36:1                     | 0.9714 | 0.9785            | 0.0069 | <b>0.0128</b>     |
| PC aa C36:2                     | 0.3005 | 0.3949            | 0.8340 | 0.8853            |
| PC aa C36:3                     | 0.0625 | 0.1065            | 0.0076 | <b>0.0139</b>     |
| PC aa C36:4                     | 0.0295 | 0.0599            | 0.0678 | 0.0984            |
| PC aa C36:5                     | 0.2228 | 0.3044            | 0.0000 | <b>2.0378E-09</b> |
| PC aa C36:6                     | 0.0069 | <b>0.0201</b>     | 0.0000 | <b>2.1361E-08</b> |
| PC aa C38:0                     | 0.0295 | 0.0599            | 0.0000 | <b>3.8333E-06</b> |
| PC aa C38:1                     | 0.3429 | 0.4465            | 0.0312 | <b>0.0496</b>     |
| PC aa C38:3                     | 0.5456 | 0.6435            | 0.0010 | <b>0.0024</b>     |
| PC aa C38:4                     | 0.5447 | 0.6435            | 0.0008 | <b>0.0019</b>     |
| PC aa C38:5                     | 0.5372 | 0.6435            | 0.0000 | <b>6.3963E-10</b> |
| PC aa C38:6                     | 0.0057 | <b>0.0178</b>     | 0.0000 | <b>4.9486E-07</b> |
| PC aa C40:2                     | 0.0211 | <b>0.0470</b>     | 0.0041 | <b>0.0078</b>     |
| PC aa C40:3                     | 0.0024 | <b>0.0102</b>     | 0.0000 | <b>3.8333E-06</b> |
| PC aa C40:4                     | 0.7429 | 0.7886            | 0.0096 | <b>0.0170</b>     |
| PC aa C40:5                     | 0.4073 | 0.5110            | 0.0000 | <b>2.5656E-08</b> |
| PC aa C40:6                     | 0.0968 | 0.1553            | 0.0000 | <b>6.3963E-10</b> |
| PC aa C42:0                     | 0.0032 | <b>0.0122</b>     | 0.0015 | <b>0.0034</b>     |
| PC aa C42:1                     | 0.0042 | <b>0.0145</b>     | 0.0092 | <b>0.0165</b>     |
| PC aa C42:2                     | 0.0223 | <b>0.0489</b>     | 0.0330 | 0.0512            |
| PC aa C42:4                     | 0.0335 | 0.0660            | 0.1412 | 0.1968            |



|                       |        |               |        |                   |
|-----------------------|--------|---------------|--------|-------------------|
| PC aa C42:5           | 0.0515 | 0.0923        | 0.9858 | 0.9858            |
| PC aa C42:6           | 0.0378 | 0.0724        | 0.0000 | <b>1.0350E-05</b> |
| PC ae C30:0           | 0.0195 | <b>0.0441</b> | 0.0000 | <b>0.0001</b>     |
| PC ae C30:1           | 0.5584 | 0.6531        | 0.1653 | 0.2236            |
| PC ae C30:2           | 0.1009 | 0.1601        | 0.0000 | <b>4.5905E-10</b> |
| PC ae C32:1           | 0.0174 | <b>0.0401</b> | 0.0011 | <b>0.0026</b>     |
| PC ae C32:2           | 0.0002 | <b>0.0015</b> | 0.0000 | <b>2.1788E-06</b> |
| PC ae C34:0           | 0.6100 | 0.6923        | 0.0000 | <b>1.2274E-06</b> |
| PC ae C34:1           | 0.0023 | <b>0.0101</b> | 0.0000 | <b>7.0769E-06</b> |
| PC ae C34:2           | 0.0006 | <b>0.0034</b> | 0.0130 | <b>0.0217</b>     |
| PC ae C34:3           | 0.0004 | <b>0.0026</b> | 0.5559 | 0.6345            |
| PC ae C36:0           | 0.0002 | <b>0.0019</b> | 0.0010 | <b>0.0024</b>     |
| PC ae C36:1           | 0.1679 | 0.2439        | 0.0000 | <b>6.3963E-10</b> |
| PC ae C36:2           | 0.0445 | 0.0829        | 0.0000 | <b>2.1253E-06</b> |
| PC ae C36:3           | 0.0046 | <b>0.0151</b> | 0.0271 | <b>0.0445</b>     |
| PC ae C36:4           | 0.5031 | 0.6199        | 0.0297 | <b>0.0479</b>     |
| PC ae C36:5           | 0.8898 | 0.9164        | 0.0130 | <b>0.0217</b>     |
| PC ae C38:0           | 0.0077 | <b>0.0213</b> | 0.0000 | <b>5.6169E-11</b> |
| PC ae C38:1           | 0.7940 | 0.8364        | 0.0019 | <b>0.0040</b>     |
| PC ae C38:2           | 0.0053 | <b>0.0171</b> | 0.0019 | <b>0.0040</b>     |
| PC ae C38:3           | 0.5855 | 0.6790        | 0.0000 | <b>6.3963E-10</b> |
| PC ae C38:4           | 0.7370 | 0.7884        | 0.0004 | <b>0.0011</b>     |
| PC ae C38:5           | 0.8844 | 0.9164        | 0.0038 | <b>0.0074</b>     |
| PC ae C38:6           | 0.2554 | 0.3455        | 0.0000 | <b>2.4905E-06</b> |
| PC ae C40:1           | 0.0662 | 0.1101        | 0.0000 | <b>5.1511E-07</b> |
| PC ae C40:2           | 0.6717 | 0.7416        | 0.0000 | <b>2.7917E-08</b> |
| PC ae C40:3           | 0.0041 | <b>0.0145</b> | 0.0000 | <b>6.1928E-07</b> |
| PC ae C40:4           | 0.2097 | 0.2924        | 0.0127 | <b>0.0217</b>     |
| PC ae C40:5           | 0.5415 | 0.6435        | 0.0000 | <b>1.6829E-05</b> |
| PC ae C40:6           | 0.1478 | 0.2193        | 0.0000 | <b>2.6195E-09</b> |
| PC ae C42:1           | 0.6337 | 0.7052        | 0.8511 | 0.8966            |
| PC ae C42:2           | 0.1154 | 0.1772        | 0.0000 | <b>4.3643E-09</b> |
| PC ae C42:3           | 0.0014 | <b>0.0067</b> | 0.0000 | <b>0.0001</b>     |
| PC ae C42:4           | 0.0269 | 0.0571        | 0.9562 | 0.9631            |
| PC ae C42:5           | 0.0492 | 0.0893        | 0.3049 | 0.3861            |
| PC ae C44:3           | 0.9836 | 0.9836        | 0.0031 | <b>0.0063</b>     |
| PC ae C44:4           | 0.0257 | 0.0555        | 0.0646 | 0.0948            |
| PC ae C44:5           | 0.1072 | 0.1681        | 0.6795 | 0.7442            |
| PC ae C44:6           | 0.0153 | <b>0.0357</b> | 0.4564 | 0.5525            |
| <b>Sphingomyelins</b> |        |               |        |                   |
| SM (OH) C14:1         | 0.2761 | 0.3663        | 0.0000 | <b>6.3963E-10</b> |
| SM (OH) C16:1         | 0.4203 | 0.5225        | 0.0000 | <b>6.3963E-10</b> |
| SM (OH) C22:1         | 0.0611 | 0.1054        | 0.0000 | <b>5.1371E-09</b> |
| SM (OH) C22:2         | 0.0013 | <b>0.0067</b> | 0.0000 | <b>6.3963E-10</b> |
| SM (OH) C24:1         | 0.9714 | 0.9785        | 0.0001 | <b>0.0002</b>     |
| SM C16:0              | 0.0005 | <b>0.0029</b> | 0.0000 | <b>2.6293E-06</b> |

|             |        |                   |        |                   |
|-------------|--------|-------------------|--------|-------------------|
| SM C16:1    | 0.0000 | <b>4.6000E-05</b> | 0.0000 | <b>2.3341E-08</b> |
| SM C18:0    | 0.0369 | 0.0718            | 0.0000 | <b>3.4305E-07</b> |
| SM C18:1    | 0.0035 | <b>0.0132</b>     | 0.0000 | <b>1.1223E-07</b> |
| SM C20:2    | 0.0003 | <b>0.0019</b>     | 0.0001 | <b>0.0002</b>     |
| SM C24:0    | 0.1470 | 0.2193            | 0.0000 | <b>2.3000E-05</b> |
| SM C24:1    | 0.0001 | <b>0.0006</b>     | 0.0000 | <b>1.8503E-06</b> |
| SM C26:0    | 0.5321 | 0.6435            | 0.0000 | <b>3.8333E-06</b> |
| SM C26:1    | 0.0611 | <b>0.1054</b>     | 0.0000 | <b>1.3788E-06</b> |
| Hexose (H1) | 0.0030 | <b>0.0116</b>     | 0.0000 | <b>7.0769E-06</b> |

\* P values are from independent t-test.

\*\*FDR-adjusted P values are adjusted for multiple comparisons using the Benjamini–Hochberg procedure.

Note: two age groups; group 1, age <45 years old; group 2, age >=45 years old.

Abbreviations are as follows. Cx:y: x=number of carbons in the fatty acid side chain, y=number of double bonds in the fatty acid side chain; DC: decarboxyl; OH: hydroxyl; lysoPC: lysophosphatidylcholine; PC: phosphatidylcholine; aa: acyl-acyl; ae: acyl-alkyl; SM: sphingomyelin.
